# Supplementary material for: Global Transcriptome Analysis Reveals Small RNAs Affecting Neisseria meningitidis Bacteremia
Source: PLoS One. 2015 May 7;10(5):e0126325. doi: 10.1371/journal.pone.0126325 (PMC4423775; doi:10.1371/journal.pone.0126325)
Supplement: S1 Table — a = restriction sites are indicated in the sequences in lowercase and underlined. b = NB stands for Northern Blot, PE stands for Primer Extension, KO stands for Knock Out generation. (XLSX) [file pone.0126325.s005.xlsx]

## Sheet: S1 Table
	S1 Table. Primers, plasmids and strains used in this study
	Primers used in this study
	Name	Sequencea	Applicationb	Restriction site
	nrrF-NB	GTATGTCTCGTATATGCCGACTCCAAGTGTGAAAGTGATGATGGGGAAAT	NrrF NB
	1205-3	GGCAGCCACACCCAAACAC	AniS PE
	sRNA10-R	CCAGCTTGATATACTCGGCGGAT	sRNA 837-838_F NB
	sRNA16-R2	AGCAGTGGGGACTGTTGCTGGTGGCATAAATGGTTATGCAGGTTCTACGG	sRNA 863-864_F NB
	sRS19-R4	GAATAAATATGTCCCATTGTCATCCCCTTAAGCTGATG	sRNA 898-899_F NB
	sRNA17-R2	ATCGTGTGGATATACGCTGTTTGTCAGGTGTTTTCAAGCACCGTGGGAAA	sRNA 899-900_F NB/PE
	sRNA32-R2	GCGCTTCGTCCAATTGAAAACGCATTGAGGGCTATTCCCTGTTATTCGAC	sRNA 910-911_F NB
	sRNA18-F2	GCCGAGCTGTCGGCATGGTTTGAAGACATCCTGTCGAGCCTGGGCATAAA	sRNA 1106-1107_R NB/PE
	GG075	GCTCCATAAGACATAATCAACTGTG	sRNA 1400-1401_F NB
	sRNA13-R2	GTTTAAACACGGTTTGCCTGTGAACGGAACAGACATTCATATGACCAAAAA	sRNA 1730-1731_F NB
	GG087	AGTATGAATGGTCAATACATTGCGG	sRNA 1923-1924_R NB/PE
	sRS17-R4	CACATTACGGGGAAAACGTTTTACTCAATGAG	sRNA 2062-2063_F NB
	Bns1_p	CCTCCCGAATATATCTGCCTGCTGTTTCCTCTTTATTCAG	sRNA 1563-1564_F NB
	s10-R4	CGGTTGCCATTAGAAACTTCCTATACTC	sRNA 837-838_F PE
	s16-R5	CTGATTAATGGTATGCGAGGTG	sRNA 863-864_F PE
	FLA-UP16F	GGTTGGAAAATCAAAGCCCTGC	sRNA 863-864_F KO
	FLA-UP16R	GCATCTTTGGAggatccGTAAGAACACTGACATTCGCCG		BamHI
	FLA-DO16F	GTGTTCTTACggatccTCCAAAGATGCAGCAAACGCAGG		BamHI
	FLA-DO16R	GCGGTGCAGGGATTACTACTAG
	UP_IG26F	GCtctagaGAAACAGGCACAACGGCAAA	sRNA 898-899_F KO	XbaI
	UP_IG26R	TCCcccgggCTTAAATCGCCCGTTAAGGC		XmaI
	DW_IG26F	TCCcccgggTTTATTTTCAACATCAGCTTAAGG		XmaI
	DW_IG26R	CCGctcgagCTTTTTCTTCCATTTTCGGGCT		XhoI
	FLA-UP17F	CGAATACTCCATGCTGTTACGTG	sRNA 899-900_F KO
	FLA-UP17R	TTTCTGCAAGCggatccGGAAATGTGTCAAGAGAATTAGCCC		BamHI
	FLA-DO17F	GACACATTTCCggatccGCTTGCAGAAAATAGAAAGATTGG		BamHI
	FLA-DO17R	CACGATAACTATTTGATTTGCTTCCG
	flaUP1400F	CCAAAGATTTGGCGGCTAACAGCC	sRNA 1400-1401_F KO
	flaUP1400R	GTCCCGACAGCggatccATATACAGATATTTCAGGCTGCCTG		BamHI
	flaDO1401F	TATCTGTATATggatccGCTGTCGGGACGGTGTGCCGAAG		BamHI
	flaDO1401R	TTCGGCAGTCCTGTTCTACCGC
	UP_bns1F	GCtctagaCGACAATCTTGTCGTGCG	sRNA 1563-1564_F KO	XbaI
	UP_bns1R	TCCcccgggGAGAATCCCGTTATTTTAAG		XmaI
	DW_bns1F	TCCcccgggCTTCAGACGGTATCAGCC		XmaI
	DW_bns1R	CCGctcgagCCGTTTTGTCCATATTTCTGC		XhoI
	flaUP1923F	TTGTACTGTCTTCGGCTTCGTCG	sRNA 1923-1924_R KO
	flaUP1923R	AAACCAATAGGggatccGCACGTTGAAAATGCCGTCTGAAC		BamHI
	flaDO1924F	TTTCAACGTGCggatccCCTATTGGTTTTCCCGTATCCAC		BamHI
	flaDO1924R	GTCGATCCGATAGACGGGACGAAC
	UP_bns2F	GCtctagaCGCCTGAAACGCATCAACC	sRNA 2062-2063_F KO	XbaI
	UP_bns2R	TCCcccgggGATGCCGTCTGAAACGGC		XmaI
	DW_bns2F	TCCcccgggGTTCCATCGGATAAAAGGC		XmaI
	DW_bns2R	CCGctcgagGATGGTGCTGTAAATGGACG		XhoI
	Deo-1	ATTCTtctagaGCAGGTTGCACAAGCCGTCG	DeoR KO	XbaI
	Deo-2	GTCGGTGGACggatccGATACCGCGATGCAGAAGATGC		BamHI
	Deo-3	CGCGGTATCggatccGTCCACCGACATAAACTGATGCC		BamHI
	Deo-4	ATTCGaagcttTGTCGTGGACGAAAGGTTTGGC		HindIII
	Gnt-1	ATTCGtctagaCCGTCAACGCCATATCGTCCAAC	GntR KO	XbaI
	Gnt-2	GAGCGGCACggatccTTGGGCAACTGTATGGAGCG		BamHI
	Gnt-3	CAGTTGCCCAAggatccGTGCCGCTCTTCGAGAATCAGGG		BamHI
	Gnt-4	ATTCGaagcttGTGCAGACTTGATTCCGGATTGTC		HindIII
	HexR-1	ATTCGtctagaCGGTTCGGCAGATTTGAATC	HexR KO	XbaI
	HexR-2	CGCTCTGATggatccGCTCCTCCAATACCGACAATAC		BamHI
	HexR-3	TGGAGGAGCggatccATCAGAGCGAAGCTGATGTCAG		BamHI
	HexR-4	ATTCGaagcttCTCCGCAAACAAAATGCCGT		HindIII
	Plasmids used in this study
	Name	Characteristics	Application	Reference or source
	pGEMT	Cloning vector, Ampr	Cloning	Promega
	pBluescript (pBS-KS)	Cloning vector, Ampr	Cloning	Novagen
	pGEMT-FLA-s16	pGEMT containing the flanking region of sRNA 863-864_F with a BamHI site in the middle, Ampr	sRNA 863-864_F KO	This study
	pGEMT-s16KO::EryR	pGEMT-FLA-s16 derivative in which a 1200bp Ery cassette was cloned as a BamHI fragment between flanking region. Ampr, Eryr		This study
	pBS-KS-FLA-IG26	pBS-KS containing the flanking region of sRNA 898-899_F with a XmaI site in the middle, Ampr	sRNA 898-899_F KO	This study
	pBS-KS-IG26::EryR	pBS-KS-FLA-IG26 derivative in which a 1200bp Ery cassette was cloned as a XmaI fragment between flanking region. Ampr, Eryr		This study
	pGEMT-FLA-s17	pGEMT containing the flanking region of sRNA 899-900_F with a BamHI site in the middle, Ampr	sRNA 899-900_F KO	This study
	pGEMT-s17KO::EryR	pGEMT-FLA-s17 derivative in which a 1200bp Ery cassette was cloned as a BamHI fragment between flanking region. Ampr, Eryr		This study
	pGEMT-FLA-s27	pGEMT containing the flanking region of sRNA 1400-1401_F with a BamHI site in the middle, Ampr	sRNA 1400-1401_F KO	This study
	pGEMT-s27KO::EryR	pGEMT-FLA-s27 derivative in which a 1200bp Ery cassette was cloned as a BamHI fragment between flanking region. Ampr, Eryr		This study
	pBS-KS-FLA-BNS1	pBS-KS containing the flanking region of sRNA 1563-1564_F with a XmaI site in the middle, Ampr	sRNA 1563-1564_F KO	This study
	pBS-KS-BNS1::EryR	pBS-KS-FLA-BNS1 derivative in which a 1200bp Ery cassette was cloned as a XmaI fragment between flanking region. Ampr, Eryr		This study
	pGEMT-FLA-s38	pGEMT containing the flanking region of sRNA 1923-1924_R with a BamHI site in the middle, Ampr	sRNA 1923-1924_R KO	This study
	pGEMT-s38KO::EryR	pGEMT-FLA-s38 derivative in which a 1200bp Ery cassette was cloned as a BamHI fragment between flanking region. Ampr, Eryr		This study
	pBS-KS-FLA-BNS2	pBS-KS containing the flanking region of sRNA 2062-2063_F with a XmaI site in the middle, Ampr	sRNA 2062-2063_F KO	This study
	pBS-KS-BNS2::EryR	pBS-KS-FLA-BNS2 derivative in which a 1200bp Ery cassette was cloned as a XmaI fragment between flanking region. Ampr, Eryr		This study
	pGEMT-DeoR:Kan	pGEMT containing the flanking region of nmb1561 with a BamHI site in the middle, Kanr	DeoR KO	This study
	pGEMT-GntR:Kan	pGEMT containing the flanking region of nmb1563 with a BamHI site in the middle, Kanr	GntR KO	This study
	pGEMT-HexR:Kan	pGEMT containing the flanking region of nmb1389 with a BamHI site in the middle, Kanr	Hex KO	This study
	Strains used in this study
	Name	Characteristics	Reference or source
	MC58	Clinical isolate, sequenced strain	Tettelin et al., Science. 2000 Mar 10;287(5459):1809-15
	MC58 Dhfq	Hfq null mutant of MC58, Cmr	Fantappiè et al., Infect Immun. 2009 May;77(5):1842-53
	MC58 DDeoR	Deo null mutant of MC58, Kanr	This study
	MC58 DGntR	Gnt null mutant of MC58, Kanr	This study
	MC58 DHexR	HexR null mutant of MC58, Kanr	This study
	MC58 DsRNA 1563-1564_F	MC58 derivative, sRNA 1563-1564_F null mutant, Kanr	This study
	2996	Clinical isolate	Comaducci et al., J Exp Med. 2002 Jun 3;195(11):1445-54
	2996 DsRNA 863-864_F	2996 derivative, sRNA 863-864_F null mutant, Eryr	This study
	2996 DsRNA 898-899_F	2996 derivative, sRNA 898-899_F null mutant, Eryr	This study
	2996 DsRNA 899-900_F	2996 derivative, sRNA 899-900_F null mutant, Eryr	This study
	2996 DsRNA1400-1401_F	2996 derivative,sRNA1400-1401_F null mutant, Eryr	This study
	2996 DsRNA 1563-1564_F	2996 derivative, sRNA 1563-1564_F null mutant, Kanr	This study
	2996 DsRNA 1923-1924_R	2996 derivative, sRNA 1923-1924_R null mutant, Eryr	This study
	2996 DsRNA 2062-2063_F	2996 derivative, sRNA 2062-2063_F null mutant, Eryr	This study
	a = restriction sites are indicated in the sequences in lowercase and underlined.
	b = NB stands for Northern Blot, PE stands for Primer Extension, KO stands for Knock Out generation.
